# Supplementary material
Source: PubMed Central journal article supplement (PMC2778748)
Supplement: supp_136.23.4055_DEV036624tableS1.pdf [file supp_136.23.4055_DEV036624tableS1.pdf]

**Table S1. Summary of human and mouse primers**

| Target              | Forward                  | Reverse                   |
|---------------------|--------------------------|---------------------------|
| Human <i>FOXC1</i>  | AGAAGAACGGCAAGTACGAGA    | TGTTGAGGGACAGATTGTGGC     |
| Human <i>EN1</i>    | GGACAATGACGTTGAAACGCAGCA | AAGGTCGTAAGCGGTTTGGCTAGA  |
| Human <i>HOXB4</i>  | AAAGCACCTCTGACTGCCAGATA  | ATGGGCACGAAAGATGAGGGAGA   |
| Human <i>NKX2-1</i> | AACCAAGCGCATCCAATCTCAAGG | TGTGCCCAGAGTGAAGTTTGGTCT  |
| Human <i>PAX6</i>   | TCTTTGCTTGGGAAATCCG      | CTGCCCCGTTCAACATCCTTAG    |
| Human <i>WNT3A</i>  | AGTGACACGCTCATGTGCAGAA   | AGACACCATCCCACCAAACCTCGAT |
| Human <i>GLI3</i>   | TTGCACAAAGGCCTACTCGAGACT | CTTGTTGCAACCTTCGTGCTCACA  |
| Mouse <i>Pax6</i>   | ATCAGCAGCAGCTTCAGTACCAGT | AGGTTGTTTGCCATGGTGAAGCTG  |
| Mouse <i>Emx1</i>   | TGTGGTTCAGAAATCGGAGGACAA | TGGGAACCCTTCTTCTTCTGCTCA  |
| Mouse <i>Dlx2</i>   | TAGTGAACGGGAAGCCAAAG     | CTGGAACCAGATTTTGACCTG     |
| Mouse <i>Nkx2-1</i> | TTGCTTTATGGTCGGACCTGGTGA | AGAAGTCGTCCAGCAGTTTGGTCT  |
| <i>GAPDH</i>        | ATGACATCAAGAAGGTGGTG     | CATACCAGGAAATGAGCTTG      |
